# Supplementary material for: Zero-oxygen balanced fused 1,2,3,4-tetrazine (TNF) as a high-performance energetic material
Source: Royal Society of Chemistry journal article supplement (doi:10.1039/d4ta05719h), 2024-01-01
Supplement: d4ta05719h1.pdf [file d4ta05719h1.pdf]

## Supporting Information

### Molecular Design of Fused 1,2,3,4-Tetrazine-Based High Performance Energetic Material with Zero Oxygen Balance

Hui Zhang<sup>1</sup>, Xinyu Du<sup>1</sup>, Xudong Han<sup>1</sup>, Gong Cheng<sup>1</sup>, Wenchuan Chen<sup>3</sup>, Yingqi Xia<sup>1, 2\*</sup>, Qi Lai<sup>1\*</sup>, Ping Yin<sup>1, 2</sup>, and Siping Pang<sup>1\*</sup>

\*Corresponding author: yingqixiabit7@bit.edu.cn, laiqi@bit.edu.cn, pangsp@bit.edu.cn.

<sup>1</sup>, School of Materials Science & Engineering, Beijing Institute of Technology, Beijing 100081, China.

<sup>2</sup>, Chongqing Innovation Center, Beijing Institute of Technology, Chongqing 401120, China.

<sup>3</sup>, State Key Laboratory of Explosion Science and Technology, Beijing Institute of Technology, Beijing 100081, China

|                                                                                                     |           |
|-----------------------------------------------------------------------------------------------------|-----------|
| <b>S1. Experimental Sections.....</b>                                                               | <b>1</b>  |
| <b>S2. Computational Details .....</b>                                                              | <b>3</b>  |
| <b>S3. Crystallographic data for TBTD, TNF and TNFF.....</b>                                        | <b>4</b>  |
| <b>S4. TG-DSC data of new compounds. ....</b>                                                       | <b>5</b>  |
| <b>S5. NMR spectra for all new compounds. ....</b>                                                  | <b>6</b>  |
| <b>S6. IR spectra. ....</b>                                                                         | <b>10</b> |
| <b>S7. Oxygen balance and detonation properties of reported fused-ring energetic compounds.....</b> | <b>11</b> |
| <b>S8. References. ....</b>                                                                         | <b>18</b> |

# S1. Experimental Sections

## 1.1 Safety Precaution

In this work, all new compounds are potential energetic materials that tend to explode under certain external stimuli. Therefore, the whole experimental process should be carried out by using proper safety equipment, such as safety shields, eye protection, and leather gloves.

## 1.2 General methods

<sup>1</sup>H NMR and <sup>13</sup>C NMR spectra were recorded at 25 °C on a Bruker 400 MHz spectrometer and 125 MHz spectrometer, respectively. Chemical shifts were reported in parts per million (ppm). The onset decomposition temperature was measured using a TA Instruments DSC25 differential scanning calorimeter at a heating rate of 5 °C min<sup>-1</sup> under a dry nitrogen atmosphere. Infrared spectra (IR) were obtained on a PerkinElmer Spectrum BX FT-IR instrument equipped with an ATR unit at 25 °C. Impact and friction sensitivities were tested by a BAM fallhammer and friction tester. Densities were determined by conducting X-ray diffractions of all single crystals were carried out at room temperature on a Bruker D8 VENTURE diffractometer using Mo-K $\alpha$  radiation ( $\lambda = 0.71073$  Å). Integration and scaling of intensity data were performed using the SAINT program. Data were corrected for the effects of absorption using SADABS. The structures were solved by direct method and refined with full-matrix least-squares technique using SHELX-2014 software. Non-hydrogen atoms were refined with anisotropic displacement parameters, and hydrogen atoms were placed in calculated positions and refined with a riding model. The crystal structures were produced employing Mercury 2021.1.0 software.

## 1.3 Synthetic Procedures

### *5,5'-Bis(trinitromethyl)-2H,2'H-[3,3'-bi(1,2,4-triazole)]-2,2'-diamine (TBTD)*

According to the literature, 5,5'-bis(trinitromethyl)-2H,2'H-3,3'-bi(1,2,4-triazole) was obtained.<sup>1</sup> Compound 5,5'-bis(trinitromethyl)-2H,2'H-3,3'-bi(1,2,4-triazole) (1.0 g, 2.3 mmol) was treated with 25% tetraethylammonium hydroxide in water (1.15 g, 2.0 eq). The mixture was stirred for 30 minutes at room temperature, and the water was removed by rotary evaporation and dissolved in acetonitrile (10 mL). Toluenesulfonyl-O-hydroxylamine (1.08 g, 2.5 eq) was added to dichloromethane (10 mL) at -5°C and added to the reaction mixture portionwise over 5min. The system continued to react for 24 hours, remained at this temperature. TLC monitoring and after the reaction, the solvent was evaporated. Collecting the crude products, the crude amide was purified by column chromatography on silica gel eluting with dichloromethane, which gave the title compounds TBTD in 58% isolated yield (0.62 g). <sup>1</sup>H NMR (400 MHz, CD<sub>3</sub>CN)  $\delta$  6.58 (s, 2H). <sup>13</sup>C NMR (100 MHz, CD<sub>3</sub>CN)  $\delta$  145.2, 142.2. <sup>15</sup>N NMR (50.68 MHz, CD<sub>3</sub>CN)  $\delta$  -32.95, -64.68, -120.84, -136.42, -292.89. **Elem. Anal. Calc** for C<sub>6</sub>H<sub>4</sub>N<sub>14</sub>O<sub>12</sub>: N%: 42.25, C%: 15.53, H%: 0.87; found: N%: 42.13, C%: 15.67, H%: 0.91.

### *2,9-Bis(trinitromethyl)bis([1,2,4]triazolo)[1,5-d:5',1'-f][1,2,3,4]tetrazine (TNF)*

TBTD (0.2 g, 0.43 mmol) was dissolved in acetonitrile (10 mL) at -5°C, and treated dropwise with

*tert-butyl* hypochlorite ( 0.12 g, 2.5 eq). TLC monitoring and after the reaction, the solvent was evaporated. Collecting the crude products, the crude amide was purified by column chromatography on silica gel eluting with dichloromethane, which gave the title compounds TNF in 78% isolated yield (0.15 g).  $^{13}\text{C}$  NMR (100 MHz,  $\text{CD}_3\text{CN}$ )  $\delta$  171.6, 151.9, 139.6.  $^{15}\text{N}$  NMR (50.68 MHz,  $\text{CD}_3\text{CN}$ )  $\delta$  -21.40, -37.10, -79.22, -84.22, -111.61, -134.14, -130.48, -137.59. **Elem. Anal.** Calc for  $\text{C}_4\text{N}_{14}\text{O}_{12}$ : N%: 42.62, C%: 15.66; found: N%: 42.46, C%: 15.57.

### 2,9-Bis(fluorodinitromethyl)bis([1,2,4]triazolo)[1,5-d:5',1'-f][1,2,3,4]tetrazine (TNFF)

At  $-5\text{ }^\circ\text{C}$ , TNF (0.5 g, 1.0 mmol) was added to the mixture of acetonitrile and methanol. After the system's stable temperature, potassium iodide (4.5 eq, 0.81g) was slowly added in batches, and the reaction temperature was maintained for 3 hours. The system was filtered, and the filter cake was washed with methanol and dried to obtain potassium salt compounds. Add 0.2 g of potassium salt compounds to acetonitrile at room temperature. Weigh the selective fluorine reagent (selectfluor, 1.0 eq, 0.15g) and add it slowly (*The addition of reagents too fast will lead to low yield*). After an overnight reaction at room temperature, TLC monitoring and filtration column chromatography obtained the target compound TNFF (0.13 g, 73%).  $^{19}\text{F}$  NMR (377 MHz,  $\text{CD}_3\text{CN}$ )  $\delta$  -99.73.  $^{13}\text{C}$  NMR (100 MHz,  $\text{CD}_3\text{CN}$ )  $\delta$  153.09, 152.83, 139.43.  $^{15}\text{N}$  NMR (50.68 MHz,  $\text{CD}_3\text{CN}$ )  $\delta$  -22.37, -27.76, -28.15, -83.39, -111.93, -136.42, -138.37.

## S2. Computational Details

Theoretical calculations were performed by using the Gaussian 09 suite of programs.<sup>2, 3</sup> Gas phase heats of formation of the title compounds were computed based on an isodesmic reaction (Scheme S1). The enthalpy of reaction was carried out by combining the M062X/6-311++G\*\* energy difference for the reactions, the scaled zero-point energies (ZPE), values of thermal correction (HT), and other thermal factors. The solid-state heats of formation were obtained by employing Trouton's rule according to equation 1 (T represents either melting point or decomposition temperature when no melting occurs prior to decomposition).<sup>4</sup>

$$\Delta H_{\text{sub}} = 188/\text{J mol}^{-1} \text{K}^{-1} \times T \quad (1)$$

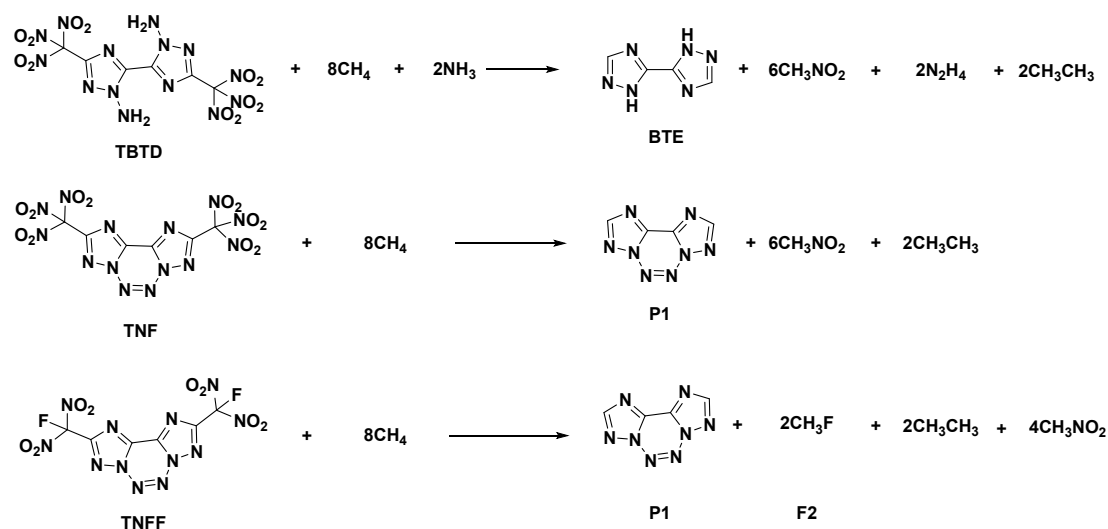

**Scheme S1.** Isodesmic reactions for TBTD, TNF and TNFF.

| Species                         | ZPE      | H <sub>corr</sub> | E <sub>0</sub> | Corrected E <sub>0</sub> | ΔH <sub>f</sub> (kJ/mol) |
|---------------------------------|----------|-------------------|----------------|--------------------------|--------------------------|
| Tetra                           | 0.086661 | 0.094693          | -591.5231      | -591.4319                | 816.48574                |
| BTE                             | 0.100371 | 0.108321          | -483.3296      | -483.2253                | 382.25163                |
| CH <sub>3</sub> CH <sub>3</sub> | 0.074397 | 0.078825          | -79.80667      | -79.73082                | -86.07562                |
| N <sub>2</sub> H <sub>4</sub>   | 0.053277 | 0.057483          | -111.8626      | -111.8072                | 99.122171                |
| CH <sub>3</sub> F               | 0.039006 | 0.042862          | -139.7207      | -139.6794                | -234.3                   |
| CH <sub>3</sub> NO <sub>2</sub> | 0.049673 | 0.054999          | -245.0103      | -244.9573                | -88.06903                |
| NH <sub>3</sub>                 | 0.034305 | 0.038114          | -56.55195      | -56.51521                | -45.09579                |
| CH <sub>4</sub>                 | 0.044599 | 0.048412          | -40.50181      | -40.45518                | -74.6                    |
| TBTD                            | 0.200425 | 0.229912          | -1899.554      | -1899.332                | 676.5034367              |
| TNF                             | 0.153087 | 0.180152          | -1897.088      | -1896.914                | 929.2759303              |
| TNFF                            | 0.134116 | 0.157461          | -1686.62       | -1686.468                | 348.23843                |

**Table S1.** The scaled zero point energies (*ZPE*), values of thermal correction (*H<sub>corr</sub>*), total energy (*E<sub>0</sub>*) and heats of formation (*HOF*)

### S3. Crystallographic data for TBTD, TNF and TNFF.

| CCDC No.                           | 2252071                                                       | 2257694                                        | 2322374                                                      |
|------------------------------------|---------------------------------------------------------------|------------------------------------------------|--------------------------------------------------------------|
| Empirical formula                  | C <sub>6</sub> H <sub>4</sub> N <sub>14</sub> O <sub>12</sub> | C <sub>6</sub> N <sub>14</sub> O <sub>12</sub> | C <sub>6</sub> F <sub>2</sub> N <sub>12</sub> O <sub>8</sub> |
| Formula weight                     | 464.23                                                        | 460.2                                          | 406.18                                                       |
| Temperature/K                      | 296.15                                                        | 296(2)                                         | 296                                                          |
| Crystal system                     | monoclinic                                                    | triclinic                                      | triclinic                                                    |
| Space group                        | P2 <sub>1</sub> /n                                            | P-1                                            | P-1                                                          |
| a/Å                                | 11.453(3)                                                     | 5.859(5)                                       | 5.7826(2)                                                    |
| b/Å                                | 10.262(2)                                                     | 11.684(10)                                     | 10.8042(3)                                                   |
| c/Å                                | 14.329(3)                                                     | 12.127(10)                                     | 12.2660(4)                                                   |
| α/°                                | 90                                                            | 100.143(9)                                     | 108.876(3)                                                   |
| β/°                                | 97.651(6)                                                     | 98.783(9)                                      | 90.143(3)                                                    |
| γ/°                                | 90                                                            | 100.825(9)                                     | 105.181(3)                                                   |
| Volume/Å <sup>3</sup>              | 1669.2(6)                                                     | 787.8(11)                                      | 696.62(4)                                                    |
| Z                                  | 4                                                             | 2                                              | 2                                                            |
| ρ <sub>calc</sub> /cm <sup>3</sup> | 1.847                                                         | 1.94                                           | 1.936                                                        |
| μ/mm <sup>-1</sup>                 | 0.176                                                         | 0.186                                          | 1.735                                                        |
| F(000)                             | 936                                                           | 460                                            | 404                                                          |
| Crystal size/mm <sup>3</sup>       | 0.2 × 0.2 × 0.2                                               | 0.19 × 0.16 × 0.15                             | 0.29 × 0.19 × 0.17                                           |
| Goodness-of-fit on F <sup>2</sup>  | 1.057                                                         | 1.005                                          | 1.071                                                        |
| Final R indexes                    | R <sub>1</sub> = 0.1054, wR <sub>2</sub> =                    | R <sub>1</sub> = 0.0647, wR <sub>2</sub> =     | R <sub>1</sub> = 0.0513, wR <sub>2</sub> =                   |

|                            |                                                   |                                                   |                                                   |
|----------------------------|---------------------------------------------------|---------------------------------------------------|---------------------------------------------------|
| [I>>=2σ (I)]               | 0.2838                                            | 0.1647                                            | 0.1554                                            |
| Final R indexes [all data] | R <sub>1</sub> = 0.1726, wR <sub>2</sub> = 0.3267 | R <sub>1</sub> = 0.1142, wR <sub>2</sub> = 0.1998 | R <sub>1</sub> = 0.0569, wR <sub>2</sub> = 0.1633 |

## S4. TG-DSC data of new compounds.

The decomposition temperature was investigated using TG-DSC at a heating rate of 5 °C·min<sup>-1</sup> under dry nitrogen atmosphere (50 mL·min<sup>-1</sup>).

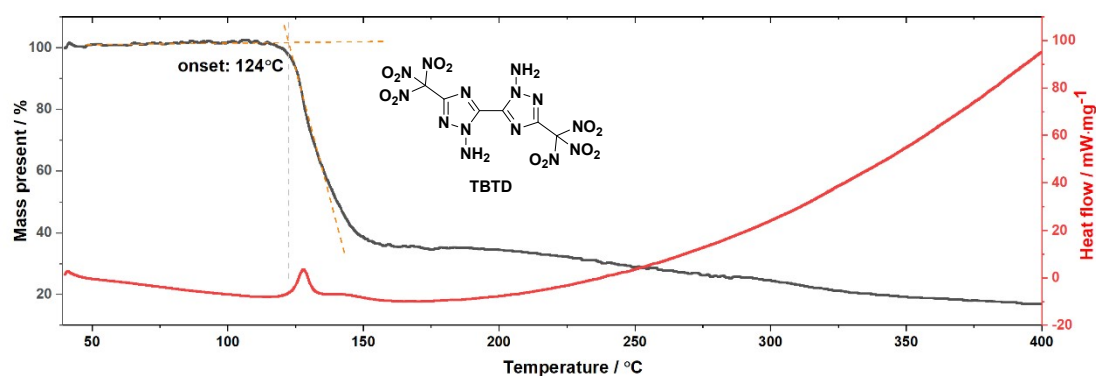

Figure S1. TG-DSC curves of TBTD

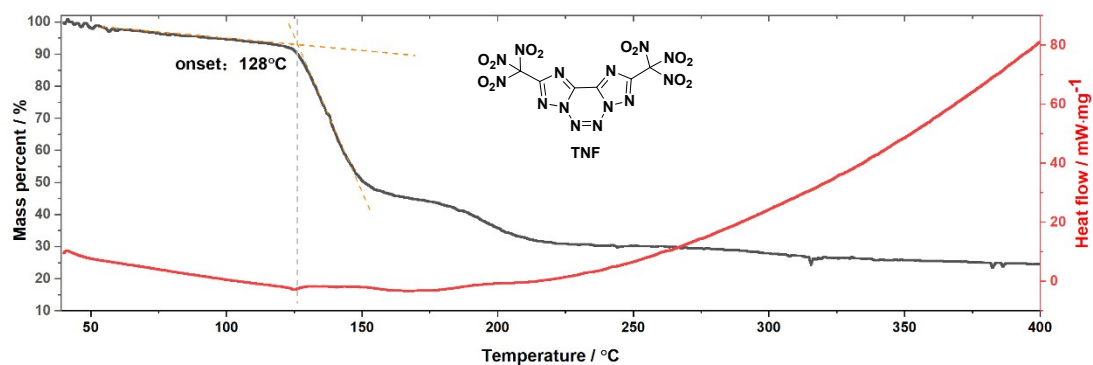

Figure S2. TG-DSC curves of TNF

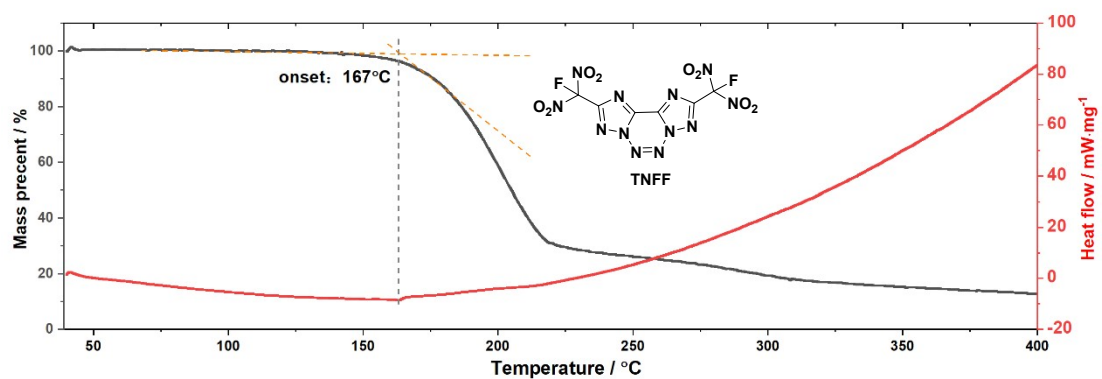

Figure S3. TG-DSC curves of TNFF

## S5. NMR spectra for all new compounds.

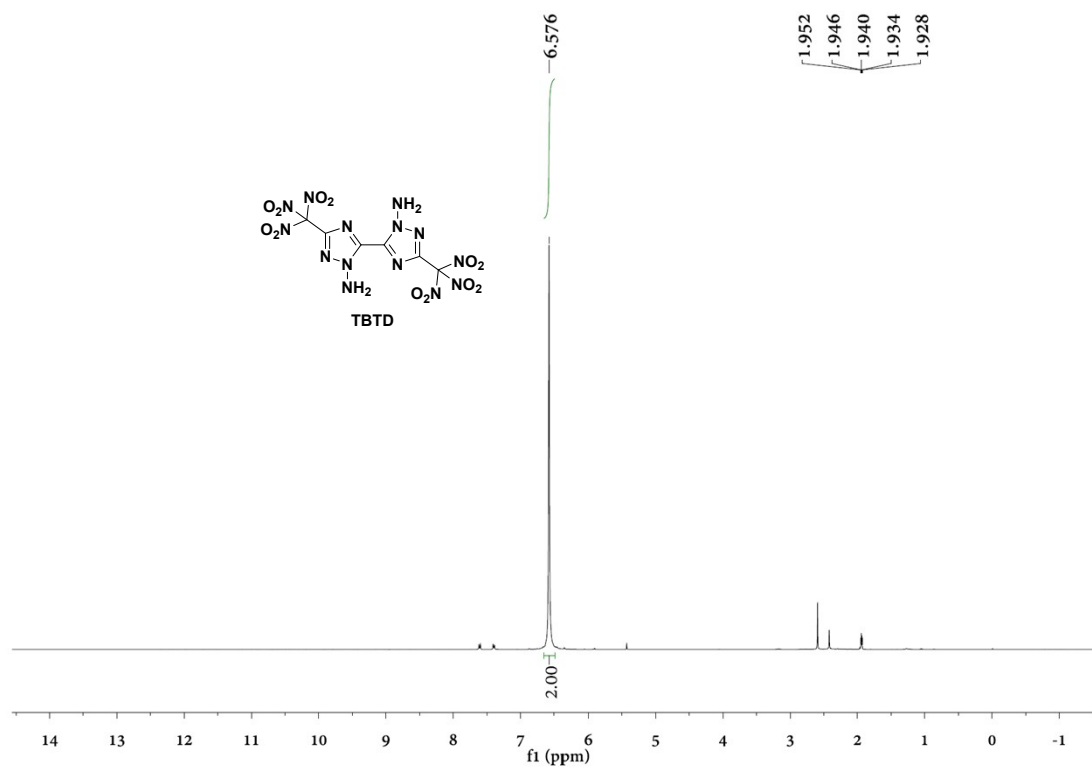

Figure S4. TBTD-<sup>1</sup>H NMR

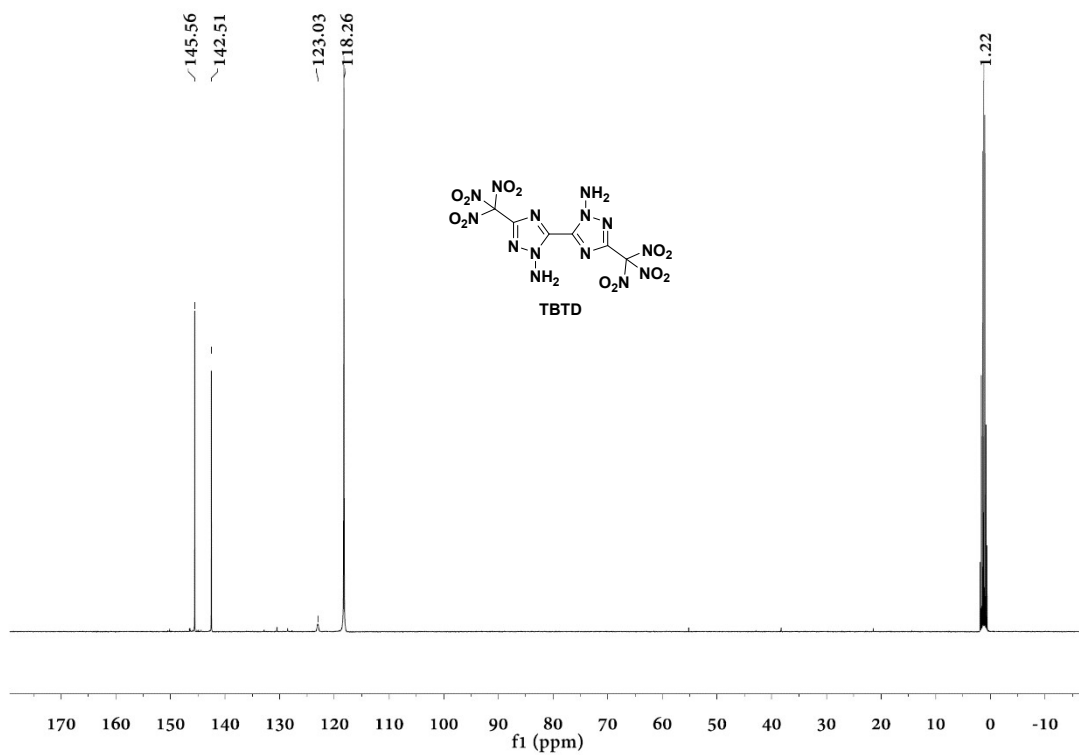

Figure S5. TBTD-<sup>13</sup>CNMR

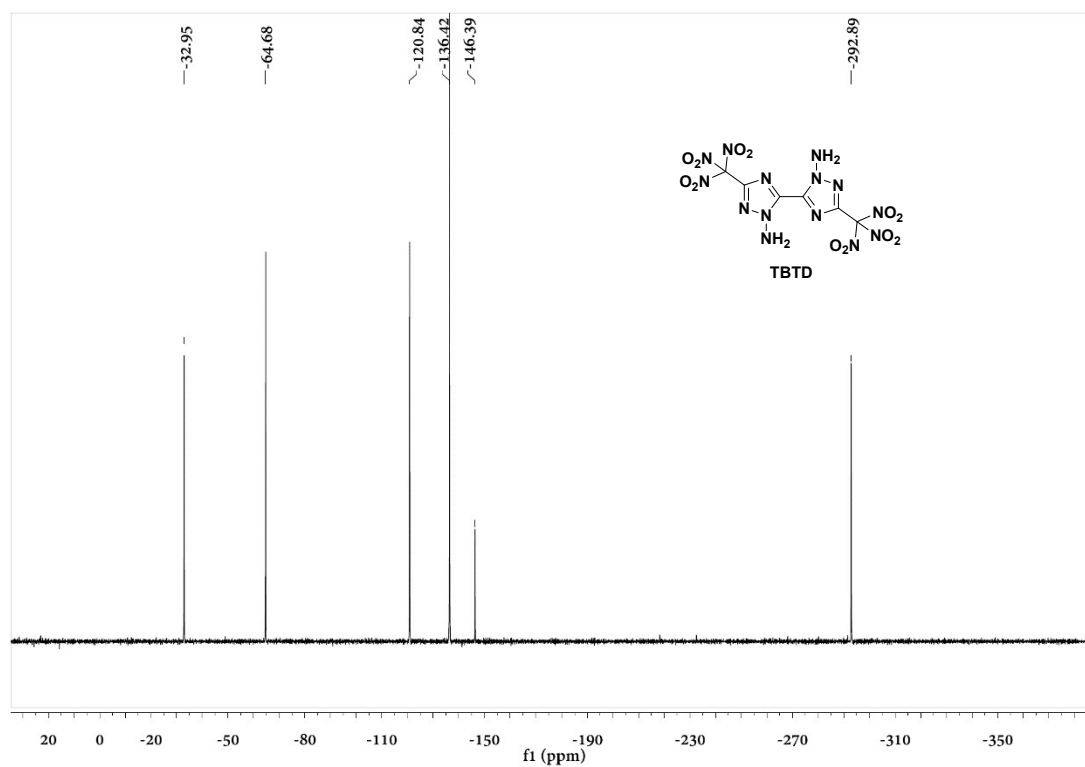

Figure S6. TBTD-<sup>15</sup>NNMR

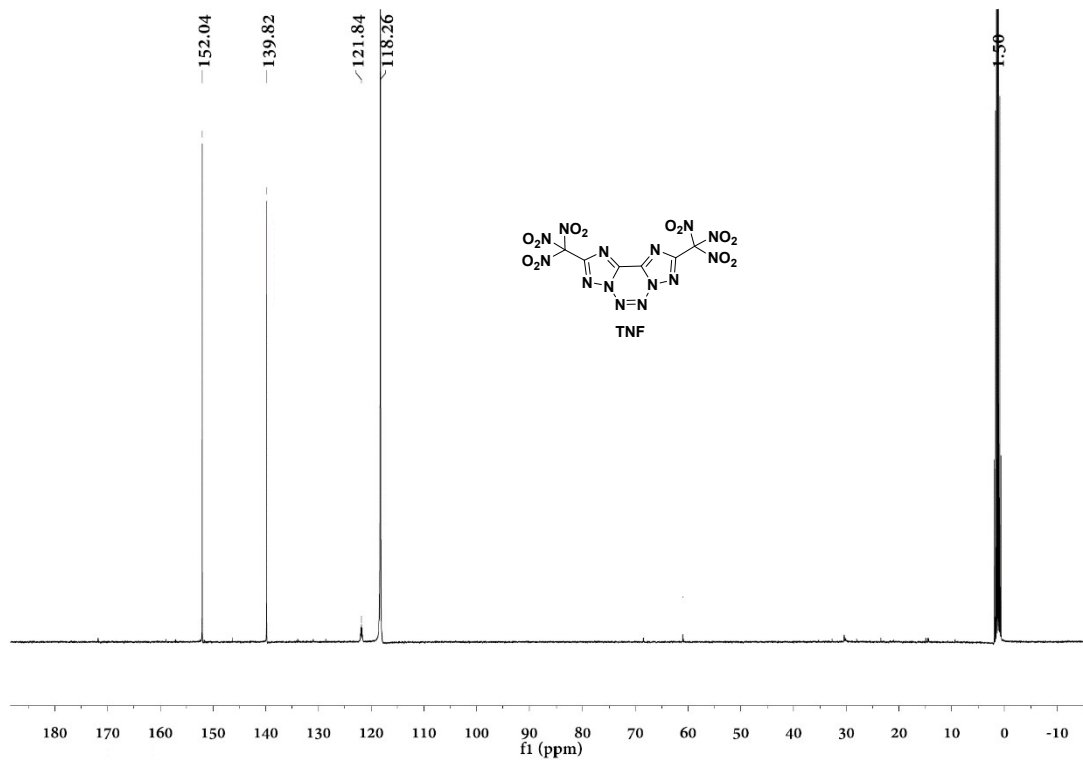

Figure S7. TNF- $^{13}\text{C}$ NMR

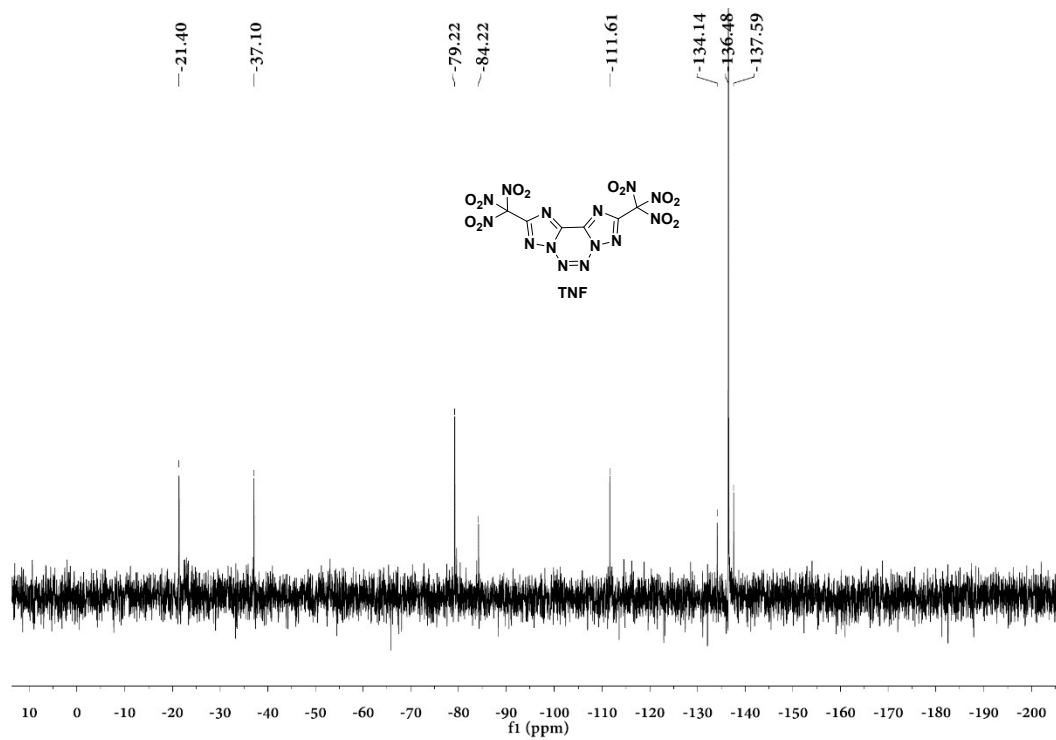

Figure S8. TNF- $^{15}\text{N}$ NMR



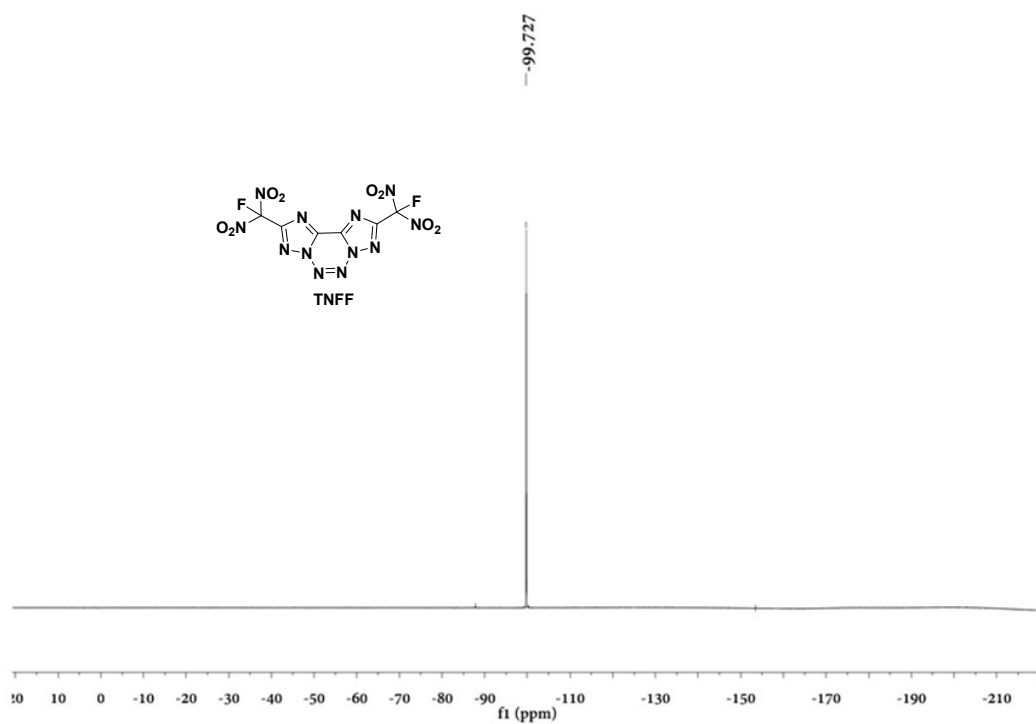

Figure S9. TNFF- $^{19}\text{F}$ NMR

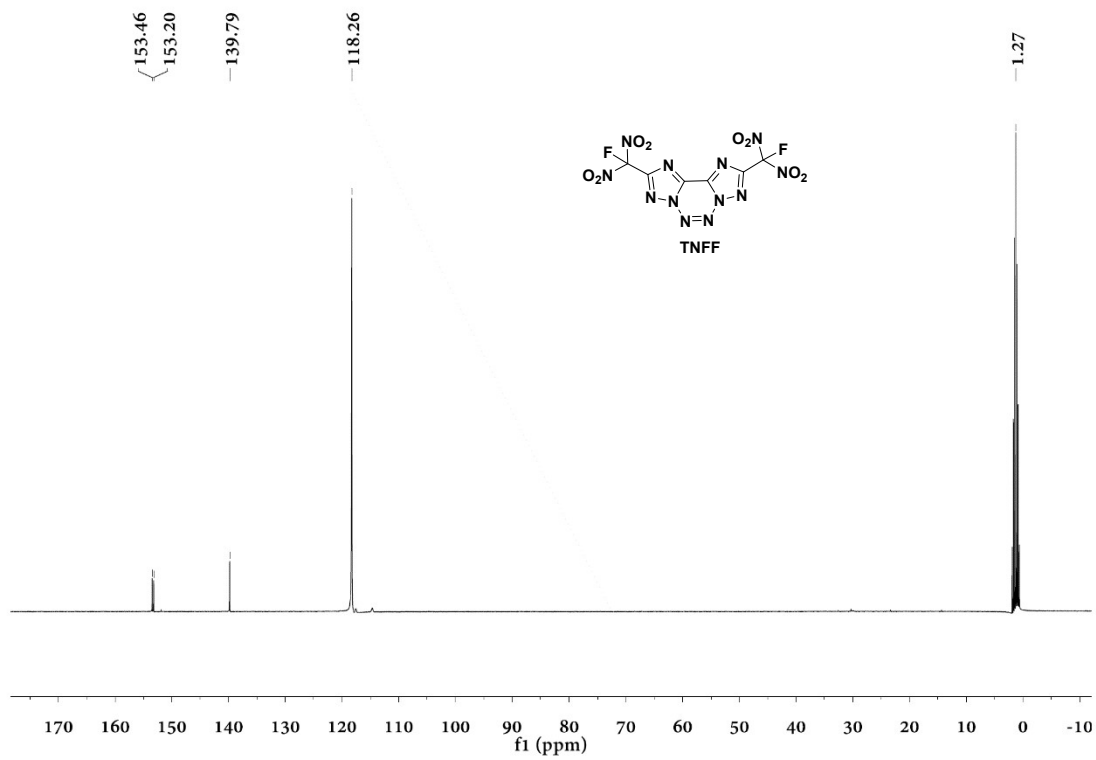

Figure S10. TNFF- $^{13}\text{C}$ NMR

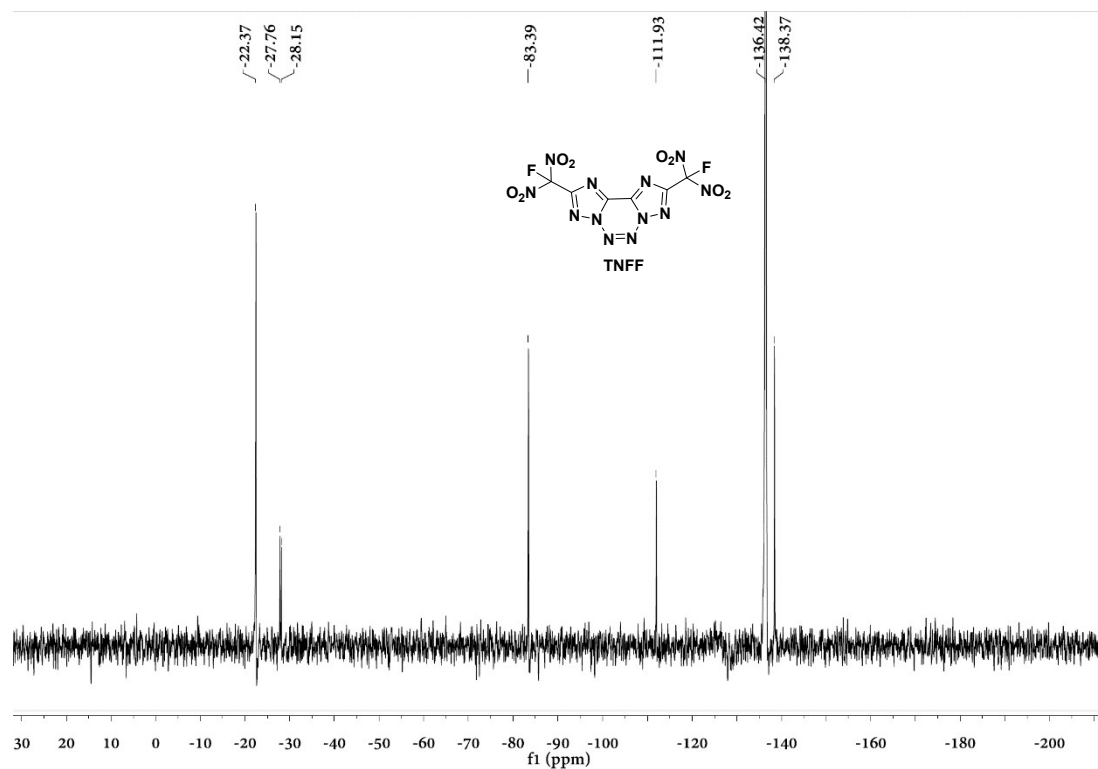

Figure S11. TNFF- $^{15}\text{N}$ NMR

## S6. IR spectra.

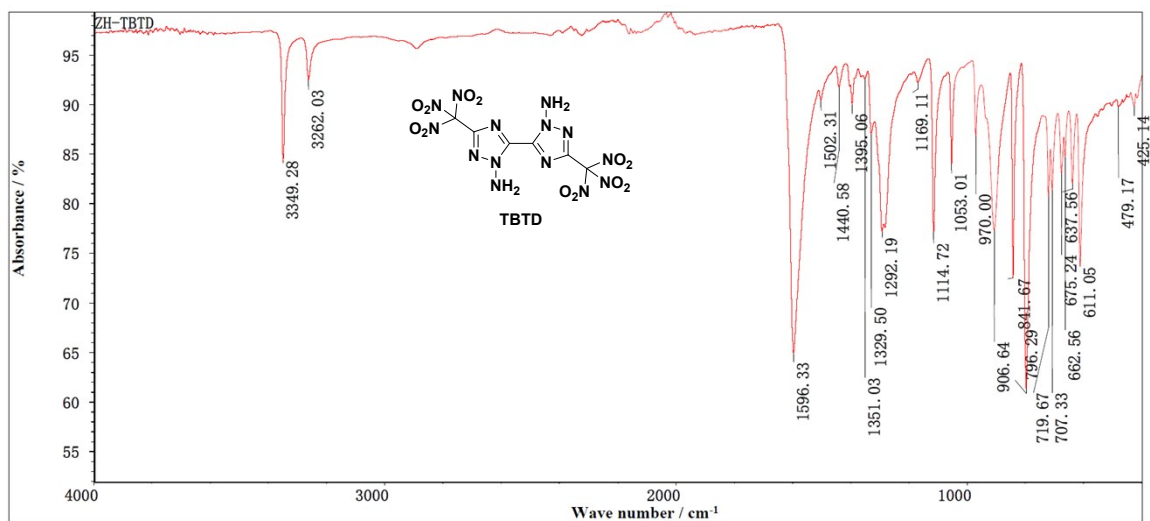

Figure S12. FT-IR curves of TBTD

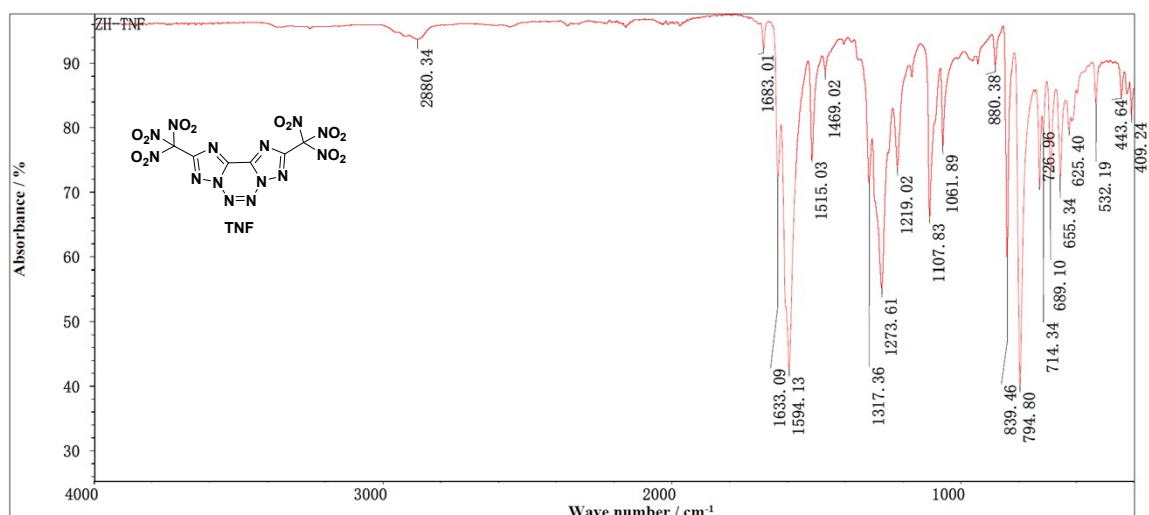

Figure S13. FT-IR curves of TNF

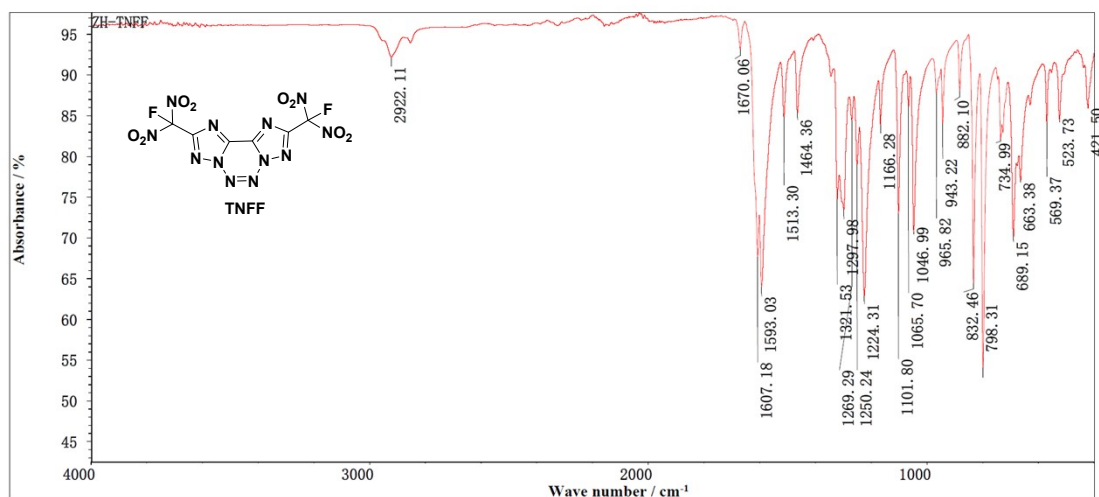

Figure S14. FT-IR curves of TNFF

## S7. Oxygen balance and detonation properties of reported fused-ring energetic compounds.

| Number | Structure                                                                           | Oxygen balance | Detonation velocity | Detonation pressure | Reference |
|--------|-------------------------------------------------------------------------------------|----------------|---------------------|---------------------|-----------|
| 1      | 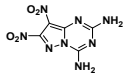 | -53.30         | 8422                | 29.8                | 5         |
| 2      |  | -84.14         | 8421                | 26.0                | 6         |

|    |                                                                                     |        |      |      |    |
|----|-------------------------------------------------------------------------------------|--------|------|------|----|
| 3  | 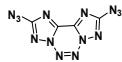   | -52.43 | 8773 | 31.1 | 7  |
| 4  |    | -33.78 | 9047 | 35.1 | 8  |
| 5  |    | -26.43 | 9317 | 39.3 | 8  |
| 6  |    | -26.43 | 9317 | 39.3 | 9  |
| 7  |    | -42.77 | 8875 | 34.5 | 10 |
| 8  |    | -65.26 | -    | -    | 10 |
| 9  |    | -43.93 | 8621 | 30.4 | 11 |
| 10 |    | -19.83 | 9301 | 38.3 | 11 |
| 11 |   | -36.90 | 9500 | 39.8 | 11 |
| 12 |  | -61.01 | 8423 | 27.3 | 12 |
| 13 |  | -50.42 | 8912 | 32.2 | 12 |
| 14 |  | -65.26 | 8623 | 28.4 | 12 |
| 15 |  | -36.22 | 8568 | 31.5 | 13 |
| 16 |  | -53.30 | 8263 | 28.6 | 13 |
| 17 |  | -93.42 | 8580 | 25.9 | 14 |
| 18 |  | -35.17 | 8792 | 34.3 | 15 |
| 19 |  | -35.94 | 8356 | 29.6 | 15 |
| 20 |  | -21.94 | 9226 | 38.8 | 15 |
| 21 |  | -47.97 | 8250 | 27.4 | 16 |
| 22 |  | -5.52  | 9460 | 40.9 | 16 |

|    |                                                                                     |        |      |       |    |
|----|-------------------------------------------------------------------------------------|--------|------|-------|----|
| 23 |    | -48.67 | 8864 | 33.9  | 16 |
| 24 |    | -9.99  | 9507 | 41.8  | 16 |
| 25 |    | -39.44 | 9120 | 35.1  | 17 |
| 26 |    | -40.38 | 8089 | 26.9  | 18 |
| 27 |    | -52.76 | 8528 | 29.4  | 19 |
| 28 |    | -71.99 | 8102 | 25.0  | 19 |
| 29 |    | -36.50 | 8926 | 33.7  | 20 |
| 30 |    | -80.33 | 8809 | 29.3  | 20 |
| 31 |    | -39.44 | 9111 | 35.14 | 21 |
| 32 |   | -30.59 | -    | -     | 22 |
| 33 |  | -29.62 | 8998 | 36.04 | 23 |
| 34 |  | -35.38 | 8700 | 32    | 24 |
| 35 |  | -26.43 | 8970 | 35.4  | 24 |
| 36 |  | -65.26 | 8899 | 30.3  | 25 |
| 37 |  | -35.38 | 9021 | 34.8  | 25 |
| 38 |  | -26.65 | 8994 | 34.1  | 26 |
| 39 |  | -42.08 | 8819 | 32.4  | 26 |
| 40 |  | -83.27 | 8544 | 27.3  | 27 |
| 41 |  | -50.60 | 9073 | 34    | 27 |
| 42 |  | -43.13 | 8538 | 30.4  | 28 |
| 43 |  | -89.59 | 7980 | 23.7  | 29 |
| 44 |  | -37.25 | 9241 | 37.8  | 29 |

|    |                                                                                     |         |       |       |    |
|----|-------------------------------------------------------------------------------------|---------|-------|-------|----|
| 45 |    | -28.22  | 10030 | 45.78 | 30 |
| 46 |    | -41.53  | 9326  | 36.4  | 31 |
| 47 |    | -38.28  | 8290  | 29.4  | 32 |
| 48 |    | -47.03  | 8838  | 36.01 | 33 |
| 49 |    | -76.99  | 9200  | 34.8  | 34 |
| 50 |    | -62.88  | 8581  | 28.5  | 34 |
| 51 |    | -32.27  | 9236  | 36.3  | 34 |
| 52 |    | -54.51  | 9149  | 34.3  | 34 |
| 53 |    | -18.82  | 9631  | 44    | 35 |
| 54 |   | -62.19  | 8837  | 32.9  | 36 |
| 55 |  | -109.92 | 7769  | 21.9  | 36 |
| 56 |  | -90.57  | 8501  | 27.5  | 36 |
| 57 |  | -139.98 | 6747  | 14.1  | 37 |
| 58 |  | -133.20 | 7000  | 18.5  | 37 |
| 59 |  | -93.63  | 7600  | 19.9  | 37 |
| 60 |  | -50.42  | 8746  | 31.5  | 38 |
| 61 |  | -57.11  | 8434  | 27.7  | 38 |
| 62 |  | -60.26  | 8935  | 34.5  | 39 |
| 63 |  | -40.38  | 8770  | 33.7  | 39 |
| 64 |  | -75.97  | 7853  | 24.5  | 40 |
| 65 |  | -76.58  | 8657  | 27.82 | 41 |
| 66 |  | -51.92  | 8990  | 33.45 | 41 |

|    |                                                                                     |        |      |       |    |
|----|-------------------------------------------------------------------------------------|--------|------|-------|----|
| 67 | 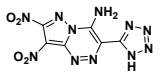   | -51.85 | 8755 | 31.67 | 41 |
| 68 |    | -43.99 | 8851 | 32.89 | 41 |
| 69 |    | -84.14 | -    | -     | 42 |
| 70 |    | -74.20 | 7060 | 20.2  | 43 |
| 71 |    | -65.67 | 7520 | 24.5  | 43 |
| 72 |    | -53.31 | 8010 | 29.2  | 43 |
| 73 |    | -53.31 | 8010 | 29.2  | 43 |
| 74 |    | -32.31 | 9384 | 39.1  | 44 |
| 75 |    | -66.62 | 8808 | 30.1  | 44 |
| 76 |    | -57.80 | 9008 | 28.8  | 44 |
| 77 |  | -21.04 | 8883 | 34.8  | 45 |
| 78 |  | -82.29 | 7658 | 19.8  | 45 |
| 79 |  | -12.40 | 9503 | 41    | 46 |
| 80 |  | -62.71 | 7800 | 29    | 47 |
| 81 |  | -97.76 | 7891 | 21    | 48 |
| 82 |  | -59.47 | 8360 | 29    | 49 |
| 83 |  | -8.00  | 9710 | 43.2  | 50 |
| 84 |  | -75.05 | 8338 | 26.9  | 51 |
| 85 |  | -64.33 | 8926 | 32.1  | 51 |
| 86 |  | -50.42 | 9029 | 34.3  | 51 |
| 87 |  | -42.08 | 8807 | 32.9  | 51 |
| 88 |  | -72.97 | 6865 | 17.9  | 52 |

|     |                                                                                     |         |      |       |    |
|-----|-------------------------------------------------------------------------------------|---------|------|-------|----|
| 89  | 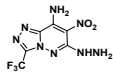   | -71.90  | 7420 | 21.1  | 52 |
| 90  |    | -63.05  | 7480 | 23.8  | 52 |
| 91  |    | -64.41  | 8833 | 29.1  | 52 |
| 92  |    | -52.80  | 8797 | 31.3  | 52 |
| 93  |    | -12.83  | 9492 | 41    | 53 |
| 94  |    | -25.39  | 9400 | 38    | 54 |
| 95  |    | -83.27  | 8340 | 29.2  | 55 |
| 96  |    | -50.60  | 8940 | 38    | 55 |
| 97  |    | -28.35  | 9370 | 45.9  | 55 |
| 98  |    | -39.44  | 8855 | 38.7  | 55 |
| 99  |  | -50.42  | 8930 | 38.1  | 55 |
| 100 |  | -57.70  | 8360 | 31.8  | 55 |
| 101 |  | -38.54  | 9256 | 36.7  | 56 |
| 102 |  | -44.07  | 8411 | 33    | 57 |
| 103 |  | -111.75 | 6648 | 16.27 | 58 |
| 104 |  | -94.25  | 7005 | 16.91 | 58 |
| 105 |  | -82.33  | 7723 | 31.03 | 58 |
| 106 |  | -       | -    | -     | 59 |
| 107 |  | -53.30  | 8727 | 32.6  | 60 |
| 108 |  | -51.29  | 8555 | 30    | 61 |
| 109 |  | -51.29  | 8755 | 32.1  | 61 |
| 110 |  | -29.82  | 8976 | 34.6  | 61 |



|     |                                                                                     |         |      |       |    |
|-----|-------------------------------------------------------------------------------------|---------|------|-------|----|
| 111 | 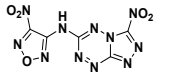   | -29.82  | 9182 | 36.7  | 61 |
| 112 |    | -51.17  | 8069 | 25.7  | 61 |
| 113 |    | -51.17  | 8532 | 29.9  | 61 |
| 114 |    | -30.86  | 8597 | 31.9  | 62 |
| 115 |    | -26.39  | 8547 | 32.5  | 62 |
| 116 |    | -97.48  | 8262 | 24.6  | 63 |
| 117 |    | -97.65  | 8273 | 24.3  | 64 |
| 118 |    | -32.41  | 8530 | 27.3  | 64 |
| 119 |    | -9.60   | 9010 | 35    | 65 |
| 120 |  | -25.10  | 8590 | 33    | 65 |
| 121 |  | -82.33  | 8196 | 24.2  | 66 |
| 123 |  | -70.25  | 8336 | 27.3  | 67 |
| 124 |  | -111.16 | 7426 | 18.16 | 68 |
| 125 |  | -52.76  | 8845 | 32.54 | 68 |
| 126 |  | 9.19    | 9199 | 37.1  | 69 |
| 127 |  | -41.58  | 7179 | 20.76 | 70 |
| 128 |  | -57.91  | 6925 | 18.81 | 70 |
| 129 |  | -52.03  | 7877 | 26.8  | 70 |
| 130 |  | -83.75  | 8322 | 26.7  | 71 |
| 131 |  | -62.16  | 8710 | 31.5  | 71 |
| 132 |  | -57.38  | 8084 | 24.9  | 72 |
| 133 |  | -115.14 | 7080 | 17.42 | 73 |

|     |                                                                                     |         |      |       |    |
|-----|-------------------------------------------------------------------------------------|---------|------|-------|----|
| 134 |    | -104.84 | 6919 | 16.98 | 73 |
| 135 |    | -74.70  | 8047 | 23.61 | 73 |
| 136 |    | -124.45 | 7384 | 19.37 | 73 |
| 137 |    | -79.20  | 8004 | 24.18 | 73 |
| 138 |    | -108.38 | 7160 | 19.41 | 74 |
| 139 |    | -28.56  | 8376 | 31.2  | 74 |
| 141 |    | -62.07  | 8644 | 30.9  | 75 |
| 142 |    | -78.71  | 8817 | 32    | 75 |
| 143 |    | -57.11  | 8855 | 33.6  | 76 |
| 144 |   | -36.91  | 9202 | 35.5  | 76 |
| 145 |  | -48.37  | 8841 | 34.2  | 76 |
| 146 |  | -38.69  | 8855 | 31.7  | 76 |
| 147 |  | -50.42  | 8544 | 29.1  | 76 |
| 148 |  | -43.61  | 9197 | 35.6  | 76 |
| 149 |  | -18.38  | 8674 | 33.1  | 77 |
| 150 |  | -30.37  | 8669 | 33.4  | 77 |
| 151 |  | -39.01  | 8057 | 27.3  | 77 |
| 152 |  | -51.92  | 8292 | 27.6  | 77 |
| 153 |  | -69.52  | 8323 | 27.8  | 77 |
| 154 |  | -42.08  | 8492 | 29.4  | 78 |
| 155 |  | -36.76  | 8862 | 35.2  | 78 |
| 156 |  | 12.90   | 9182 | 37.8  | 79 |

## S8. References.

1. A. A. Dippold and T. M. Klapötke, *Chem. - Eur. J.* 2012, **18**, 16742-16753.
2. A. D. Becke, *J. Chem. Phys.* 1993, **98**, 5648-5652.
3. P. J. Stephens, F. J. Devlin, C. F. Chabalowski and M. J. Frisch, *J. Chem. Phys.* 2002, **98**, 11623-11627.
4. M. S. Westwell, M. S. Searle, D. J. Wales and D. H. Williams, *J. Am. Chem. Soc.* 2002, **117**, 5013-5015.
5. S. Song, Y. Wang, F. Chen, M. Yan and Q. Zhang, *Engineering*. 2022, **10**, 99-109.
6. W. Hu, J. Tang, X. Ju, Z. Yi, H. Yang, C. Xiao and G. Cheng, *ACS Cent. Sci.* 2023, **9**, 742-747.
7. H. Zhang, J. Cai, Z. Li, Q. Lai, P. Yin and S. Pang, *ACS Appl. Mater. Interfaces*. 2024, **16**, 4628-4636.
8. L. Hu, C. He, G. Zhao, G. H. Imler, D. A. Parrish and J. M. Shreeve, *ACS Appl. Energy Mater.* 2020, **3**, 5510-5516.
9. J. Li, Y. Liu, W. Ma, T. Fei, C. He and S. Pang, *Nat Commun.* 2022, **13**, 5697.
10. L. Hu, R. J. Staples and J. M. Shreeve, *Chem. Eng. J.* 2021, **420**, 129839.
11. L. Hu, P. Yin, G. Zhao, C. He, G. H. Imler, D. A. Parrish, H. Gao and J. M. Shreeve, *J. Am. Chem. Soc.* 2018, **140**, 15001-15007.
12. S. Feng, P. Yin, C. He, S. Pang and J. M. Shreeve, *J. Mater. Chem. A*. 2021, **9**, 12291-12298.
13. L. Hu, C. He, S. Pang and J. M. Shreeve, *Org Lett.* 2021, **23**, 7860-7864.
14. P. Yin, J. Zhang, D. A. Parrish and J. M. Shreeve, *J. Mater. Chem. A*. 2015, **3**, 8606-8612.
15. P. Yin, J. Zhang, G. H. Imler, D. A. Parrish and J. M. Shreeve, *Angew. Chem. Int. Ed.* 2017, **56**, 8834-8838.
16. P. Yin, J. Zhang, L. A. Mitchell, D. A. Parrish and J. M. Shreeve, *Angew. Chem. Int. Ed.* 2016, **55**, 12895-12897.
17. Y. Feng, M. Deng, S. Song, S. Chen, Q. Zhang and J. M. Shreeve, *Engineering*. 2020, **6**, 1006-1012.
18. Y. Li, S.-w. Song, S.-t. Chen, K.-c. Wang and Q.-h. Zhang, *Energ. Mater. Front.* 2023, **4**, 16-23.
19. M. Deng, F. Chen, S. Song, S. Huang, Y. Wang and Q. Zhang, *Chem. Eng. J.* 2022, **429**, 132172.
20. S.-t. Chen, X.-j. Qi, T.-l. Liu and Q.-h. Zhang, *Energ. Mater. Front.* 2022, **3**, 137-145.
21. M. Deng, Y. Feng, W. Zhang, X. Qi and Q. Zhang, *Nat Commun.* 2019, **10**, 1339.
22. T. P. Kofman, A. E. Trubitsin, I. V. Dmitrienko and E. Y. Glazkova, *Russ. J. Org. Chem.* 2008, **44**, 874-881.
23. M. C. Schulze, B. L. Scott and D. E. Chavez, *J. Mater. Chem. A*. 2015, **3**, 17963-17965.
24. D. G. Piercey, D. E. Chavez, B. L. Scott, G. H. Imler and D. A. Parrish, *Angew. Chem. Int. Ed.* 2016, **55**, 15315-15318.
25. S. Chen, Y. Liu, Y. Feng, X. Yang and Q. Zhang, *Chem Commun.* 2020, **56**, 1493-1496.
26. S. Chen, W. Zhang, Y. Wang and Q. Zhang, *Chem. Eng. J.* 2021, **421**, 129635.
27. Q. Yu, J. Singh, R. J. Staples and J. M. Shreeve, *Chem. Eng. J.* 2022, **431**, 133235.
28. K. Li, W. Huang, Z. An, X. Wei and Y. Tang, *Cryst. Growth Des.* 2021, **21**, 6872-6878.
29. C. Lei, J. Tang, Q. Zhang, G. Cheng and H. Yang, *Org. Lett.* 2023, **25**, 3487-3491.
30. D. E. Chavez, D. A. Parrish, L. Mitchell and G. H. Imler, *Angew. Chem. Int. Ed.* 2017, **129**, 3629-3632.
31. H. Wei, J. Zhang and J. M. Shreeve, *Chem Asian J.* 2015, **10**, 1130-1132.
32. T. W. Myers, C. J. Snyder, D. E. Chavez, R. J. Scharff and J. M. Veauthier, *Chem. - Eur. J.* 2016, **22**, 10590-10596.

33. C. Ma, Y. Pan, J. Jiang, Z. Liu and Q. Yao, *New J. Chem.* 2018, **42**, 11259-11263.
34. Y. Liu, G. Zhao, Y. Tang, J. Zhang, L. Hu, G. H. Imler, D. A. Parrish and J. M. Shreeve, *J. Am. Chem. Soc.* 2017, **139**, 13684-13687.
36. C. Li, C. Lei, J. Tang, T. Zhu, G. Cheng and H. Yang, *Dalton Trans.* 2022, **51**, 15292-15299.
37. X. Zheng, Y. Xue, C. Dai, H. Yang and G. Cheng, *Def. Technol.* 2023, **27**, 193-199.
38. W. Huang, Y. Tang, G. H. Imler, D. A. Parrish and J. M. Shreeve, *J. Am. Chem. Soc.* 2020, **142**, 3652-3657.
39. C. Lei, G. Cheng, Z. Yi, Q. Zhang and H. Yang, *Chem. Eng. J.* 2021, **416**, 129190.
40. L. Ding, P. Wang, Q. Lin, D. Li, Y. Xu and M. Lu, *Chem. Eng. J.* 2022, **432**, 134293.
41. Z. Cheng, Z.-q. Zhang, Q. Ma, L. Yang, H. Yang, G. Cheng, G. Fan and W. Yang, *Chem. Eng. J.* 2022, **436**, 131990.
42. X. Li, Q. Sun, Q. Lin and M. Lu, *Chem. Eng. J.* 2021, **406**, 126817.
43. D. Balachari, E. D. Stevens, M. L. Trudell, D. Beardall and C. A. Wight, *Propellants, Explos., Pyrotech.* 2000, **25**, 75-80.
44. L. Hu, P. Yin, G. H. Imler, D. A. Parrish, H. Gao and J. M. Shreeve, *Chem Commun.* 2019, **55**, 8979-8982.
45. S. Wang, C. Li, T. Lu, G. Wang, H. Yin, Q. Ma, G. Fan and F.-X. Chen, *New J. Chem.* 2021, **45**, 9766-9769.
46. L. Hu, H. Gao and J. M. Shreeve, *J. Mater. Chem. A.* 2020, **8**, 17411-17414.
47. J. K. Berlin and M. D. Coburn, *J. Heterocycl. Chem.* 2009, **12**, 235-237.
48. Y. Tang, Z. An, A. K. Chinnam, R. J. Staples and J. M. Shreeve, *New J. Chem.* 2021, **45**, 85-91.
49. L. Hu, R. J. Staples and J. M. Shreeve, *Chem Commun.* 2021, **57**, 603-606.
50. M. S. Klenov, A. A. Guskov, O. V. Anikin, A. M. Churakov, Y. A. Strelenko, I. V. Fedyanin, K. A. Lyssenko and V. A. Tartakovsky, *Angew. Chem. Int. Ed.* 2016, **55**, 11472-11475.
51. L. Yang, W. Du, J. Feng, J. Li and Q. Ma, *Chem. Eng. J.* 2023, **459**, 141689.
52. Q. Liu, M. Yuan, J. He, P. Yu, X. Guo, Y. Liu, H. Gao and P. Yin, *Chem. Eng. J.* 2023, **466**, 143333.
53. C. Li, T. Zhu, J. Tang, G. Yu, Y. Yang, H. Yang, C. Xiao and G. Cheng, *Chem. Eng. J.* 2024, **479**, 147355.
54. D. E. Chavez, J. C. Bottaro and M. Petrie, D. A. *Angew. Chem. Int. Ed.* 2015, **54**, 12973-12975.
55. G. F. Rudakov, V. P. Sinditskii, I. A. Andreeva, A. I. Botnikova, P. R. Veselkina, S. K. Kostanyan, N. V. Yudin, V. V. Serushkin, G. V. Cherkaev and O. V. Dorofeeva, *Chem. Eng. J.* 2022, **450**, 138073.
56. Y. Tang, C. He, P. Yin, G. H. Imler, D. A. Parrish and J. M. Shreeve, *Eur. J. Org. Chem.* 2018, 2018, 2273-2276.
57. T. M. Klapötke, D. G. Piercey, J. Stierstorfer and M. Weyrauther, *Propellants, Explos., Pyrotech.* 2012, **37**, 527-535.
58. S. Feng, B. Yang, B. Zhang, C. Xu, Y. Liu, S. Zhu, R. Gou, S. Zhang and P. Yin, *Org. Chem. Front.* 2023, **10**, 3799-3804.
59. J.-W. Kim, J.-K. Kim, E. J. Kim, H.-S. Kim and K.-K. Koo, *Korean J. Chem. Eng.* 2010, **27**, 666-671.
60. Y. Tang, C. He, G. H. Imler, D. A. Parrish and J. M. Shreeve, *ACS Appl. Energy Mater.* 2019, **2**, 2263-2267.
61. G. Wang, T. Lu, G. Fan, C. Li, H. Yin and F. X. Chen, *Chem. - Asian J.* 2018, **13**, 3718-3722.
62. Y. Liu, J. Li, X. Zhang, C. He and S. Pang, *Mater. Chem. Front.* 2023, **7**, 1046-1057.
63. C. Lei, J. Tang, Q. Zhang, H. Yang and G. Cheng, *Org. Lett.* 2023, **25**, 2461-2465.

64. C. Lei, H. Yang, Q. Zhang and G. Cheng, *Dalton Trans.* 2021, **50**, 14462-14468.
65. A. B. Sheremetev, V. L. Korolev, A. A. Potemkin, N. S. Aleksandrova, N. V. Palysaeva, T. H. Hoang, V. P. Sinditskii and K. Y. Suponitsky, *Asian J. Org. Chem.* 2016, **5**, 1388-1397.
66. W.-H. Cui, Q. Liu, Z. Ye and Y. He, *Org. Lett.* 2023, **25**, 5661-5665.
67. J. Feng, J. Sun, L. Yang, Z.-q. Zhang, Y. Liu, Q. Ma and L.-s. Hu, *Energ. Mater. Front.* 2024, **5**, 1-7.
68. G. Zhang, H. Xiong, P. Yang, C. Lei, W. Hu, G. Cheng and H. Yang, *Chem. Eng. J.* 2024, **404**, 126514.
69. Z. Jiang, N. Ding, Q. Sun, C. Zhao, B. Tian, S. Li and S. Pang, *Chem. Eng. J.* 2023, **473**, 145331.
70. Y. Kang, Y. Dong, Y. Liu, H. Gao, Y. Wang and J. M. Shreeve, *Chem. Eng. J.* 2022, **440**, 135969.
71. C.-c. Li, H. Gu, J. Tang, G.-j. Zhang, G.-b. Cheng and H.-w. Yang, *Def. Technol.* 2023, **27**, 184-192.
72. T.-y. Hou, Z. Xu, X.-p. Zhang, Y.-g. Xu and M. Lu, *Energ. Mater. Front.* 2022, **3**, 166-171.
73. T. Zhu, C. Lei, C. Li, H. Yang, C. Xiao and G. Cheng, *J. Mater. Chem. A.* 2024, **12**, 4678-4683.
74. V. Thottempudi, F. Forohor, D. A. Parrish and J. M. Shreeve, *Angew. Chem. Int. Ed.* 2012, **51**, 9881-9885.
75. L. Yang, Z.-Q. Zhang, W. Yang, Q. Ma, W. Li and J. Li, *Cryst. Growth Des.* 2022, **23**, 532-538.
76. W. Hu, G. Zhang, P. Yang, H. Yang and G. Cheng, *Chem. Eng. J.* 2023, **451**, 138640.
77. J. Zhang, P. Yin, L. A. Mitchell, D. A. Parrish and J. M. Shreeve, *J. Mater. Chem. A.* 2016, **4**, 7430-7436.
78. H. Gao and J. M. Shreeve, *Angew. Chem. Int. Ed.* 2015, **54**, 6335-6338.
79. K. Mohammad, V. Thaltiri, N. Kommu and A. A. Vargeese, *Chem. Commun.* 2020, **56**, 12945-12948.
